# Supplementary material for: The Effect of GaSb Substrate Oxidation Layer on InAs/GaSb Type II Superlattice
Source: MDPI journal article supplement (doi:10.3390/photonics10030345), 2023-03-22
Supplement: s1 [file photonics-2237988-supplementary.pdf › photonics-2237988-supplementary.pdf]

# Supplementary Materials:

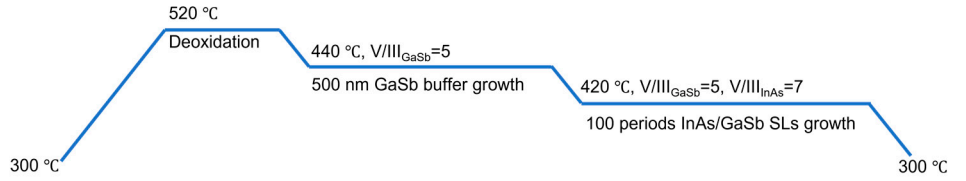

**Figure S1.** The growth process of superlattices.

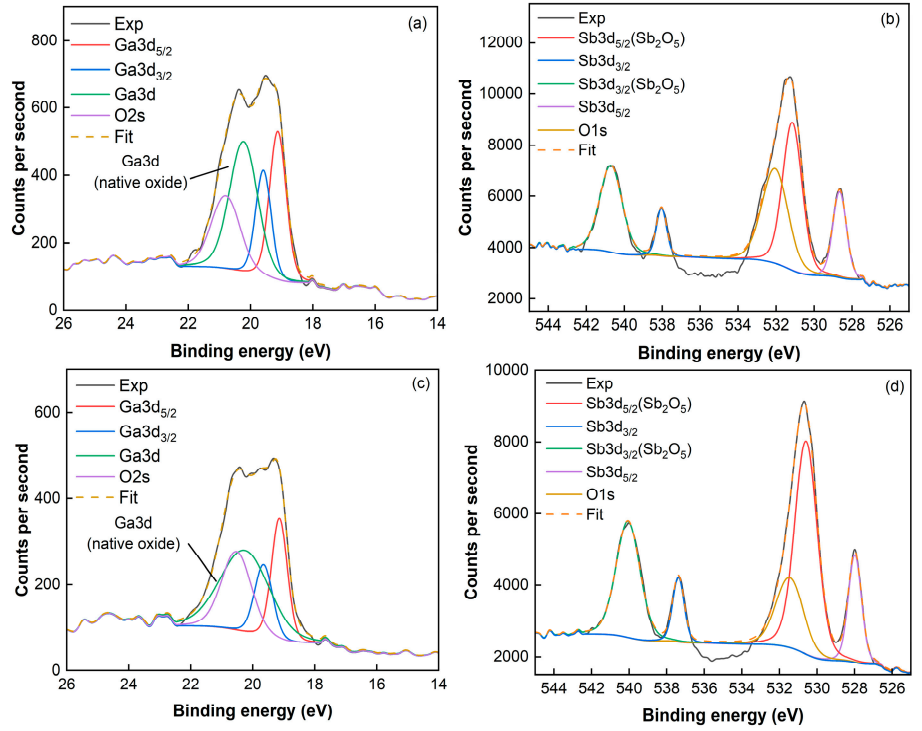

**Figure S2.** The binding rate of Ga and Sb to oxygen under different atmospheric exposure times. (a) The binding rate of Ga-O was 36.98% after 760 min of atmospheric exposure; (b) The binding rate of Sb-O was 21.51% after 760 min of atmospheric exposure; (c) The binding rate of Ga-O was 41.86% after 1440 min of atmospheric exposure; (d) The binding rate of Sb-O was 23.68% after 760 min of atmospheric exposure.

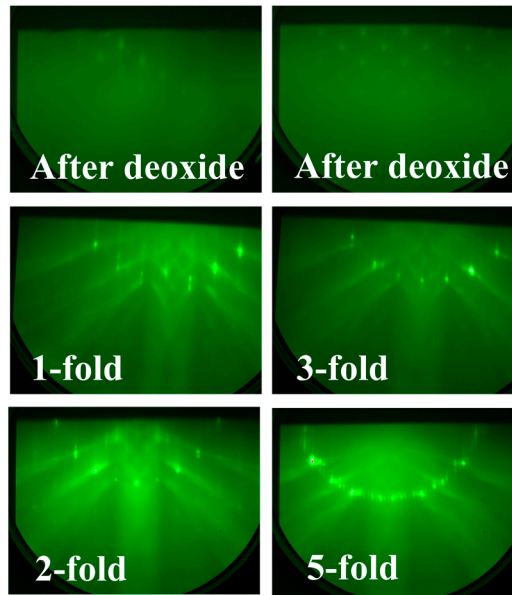

**Figure S3.** Reflection high energy electron diffraction of reconstruction processes.

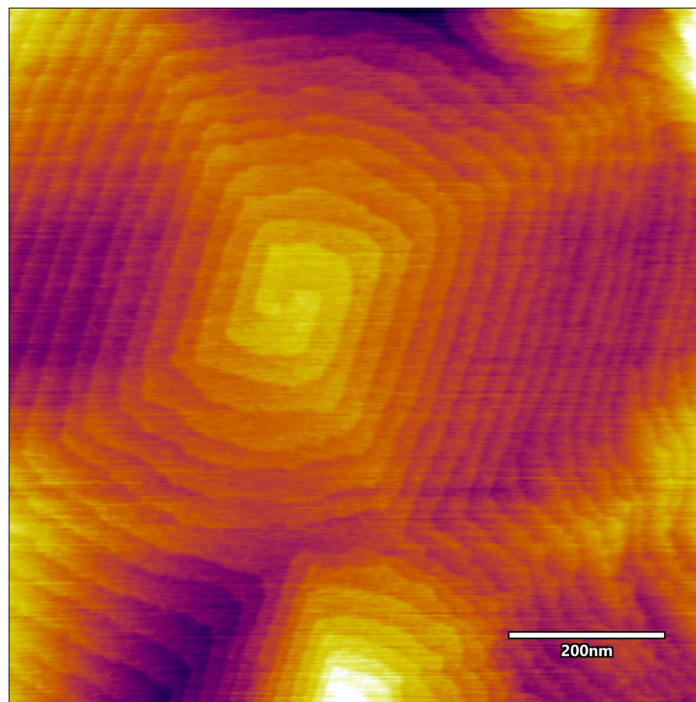

**Figure S4.** Spiral dislocations on the surface of GaSb buffers grown on GaSb substrates with 224.71Å oxide thickness were observed by atomic force microscopy.
